# Supplementary material
Source: PubMed Central journal article supplement (PMC3028903)
Supplement: supp_85_4_1420__1.pdf [file supp_85_4_1420__1.pdf]

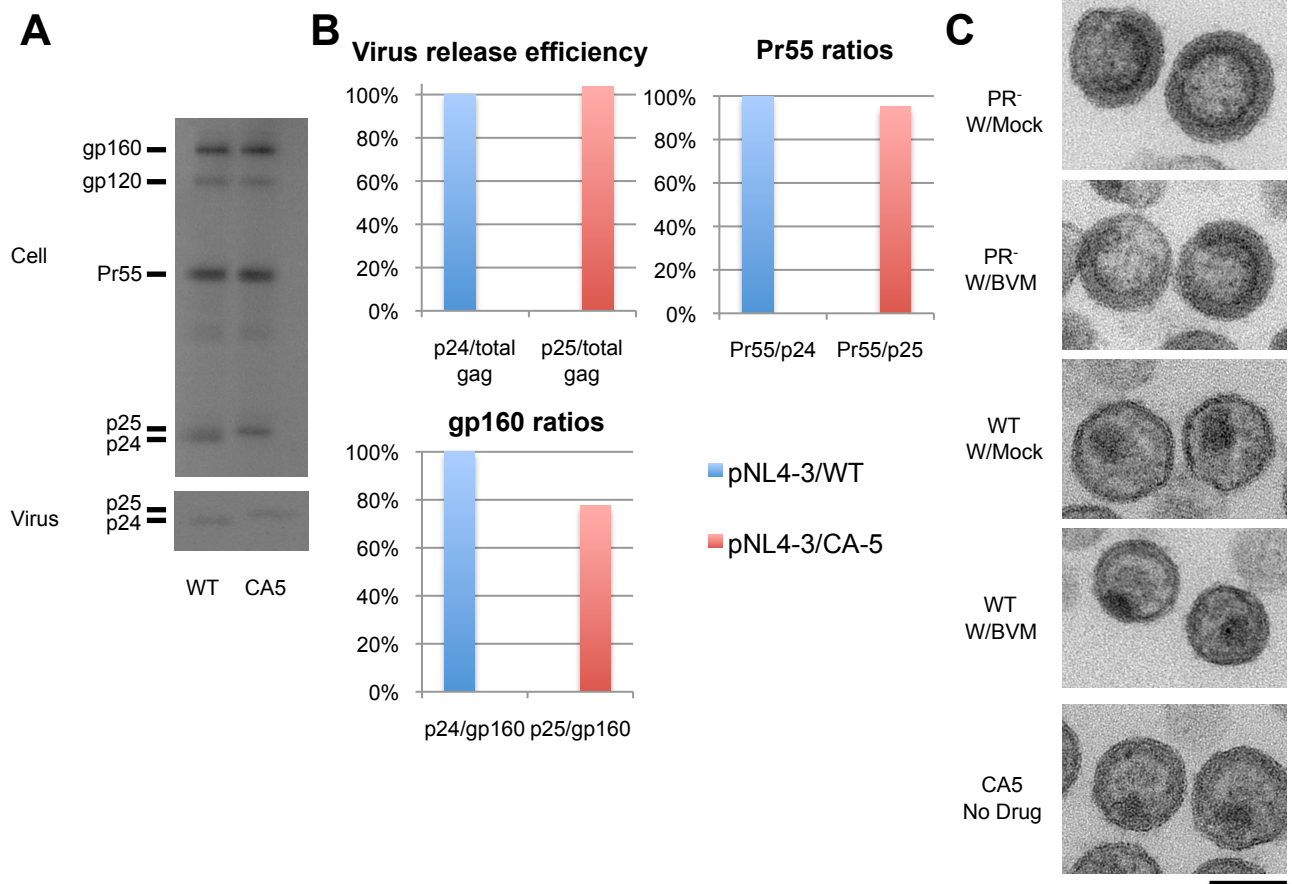

**Figure S1**

(A) Detection of viral proteins from cell lysates and supernatant. HeLa cells were transfected with WT pNL4-3 or the CA5 mutant. Cells were metabolically radiolabeled and lysates were radioimmunoprecipitated with anti-HIV-Ig and analyzed by SDS-PAGE. (B) Comparison of p25 and p24 detection efficiency. We quantified p24 and p25 bands in WT vs. CA5 and calculated virus release efficiency, then compared p24 and p25 detection to Pr55Gag or gp160 levels. Similarity of detected ratios between p24 vs. p25 confirms comparable detection efficiency. (C) Thin-section microscopy of virus particles. Morphology of virus particles produced for analysis by cryo-ET was confirmed by thin-section TEM. From top to bottom: pNL4-3 PR- (immature) w/ Mock treatment, pNL4-3 PR- + 4  $\mu\text{g}/\text{mL}$  BVM, pNL4-3 WT w/ Mock treatment, pNL4-3 WT + 4  $\mu\text{g}/\text{mL}$  BVM, pNL4-3 CA5. Scale bar = 100nm.
